# Supplementary material for: Computational study, synthesis and evaluation of active peptides derived from Parasporin-2 and spike protein from Alphacoronavirus against colorectal cancer cells
Source: Oxford University Press journal article supplement (doi:10.1042/bsr20211964), 2021-11-19
Supplement: bsr-2021-1964_supp.pdf [file bsr-2021-1964_supp.pdf]

# Supporting information

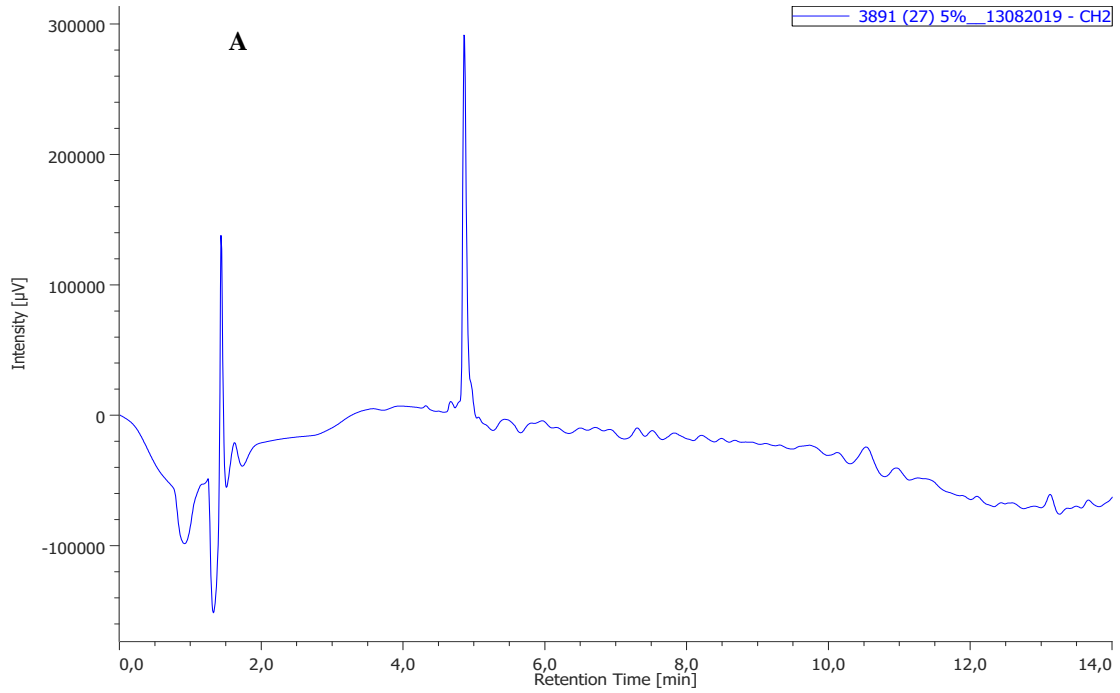

## B

Peak#:1 R. Time:2.183(Scan#:) MassPeaks:1318  
Spectrum Mode: Averaged 2.167-2.200(131-133)  
BG Mode:Calc Segment 1 - Event 1

BasePeak:564.7(28147726)

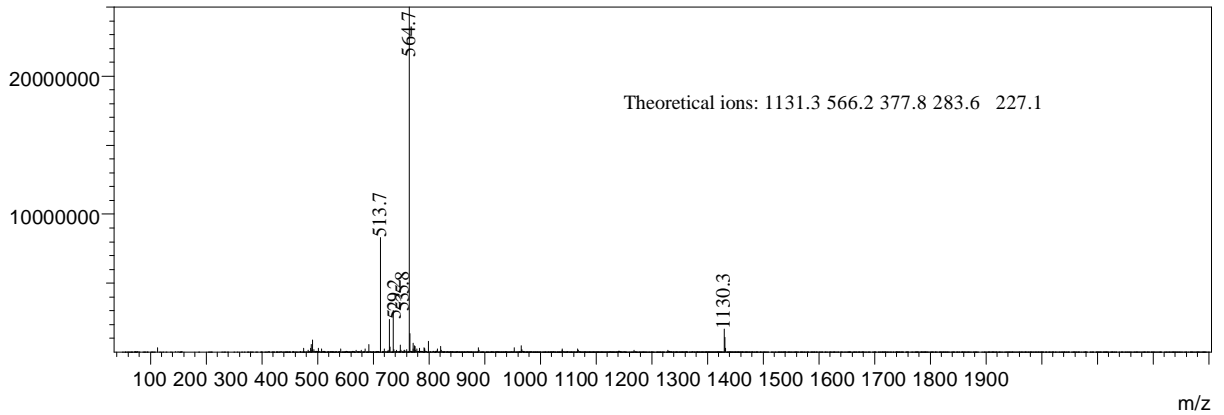

**Figure S1.** Characterization of P264-G274 peptide. A) Chromatogram spectra. B) mass spectra.

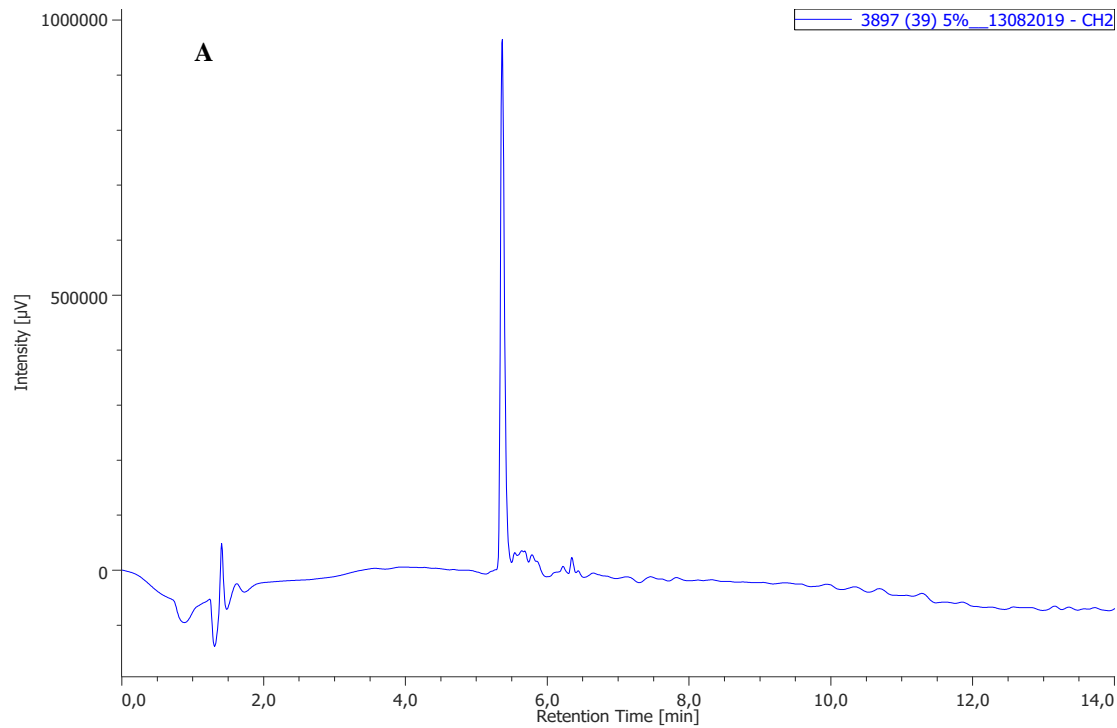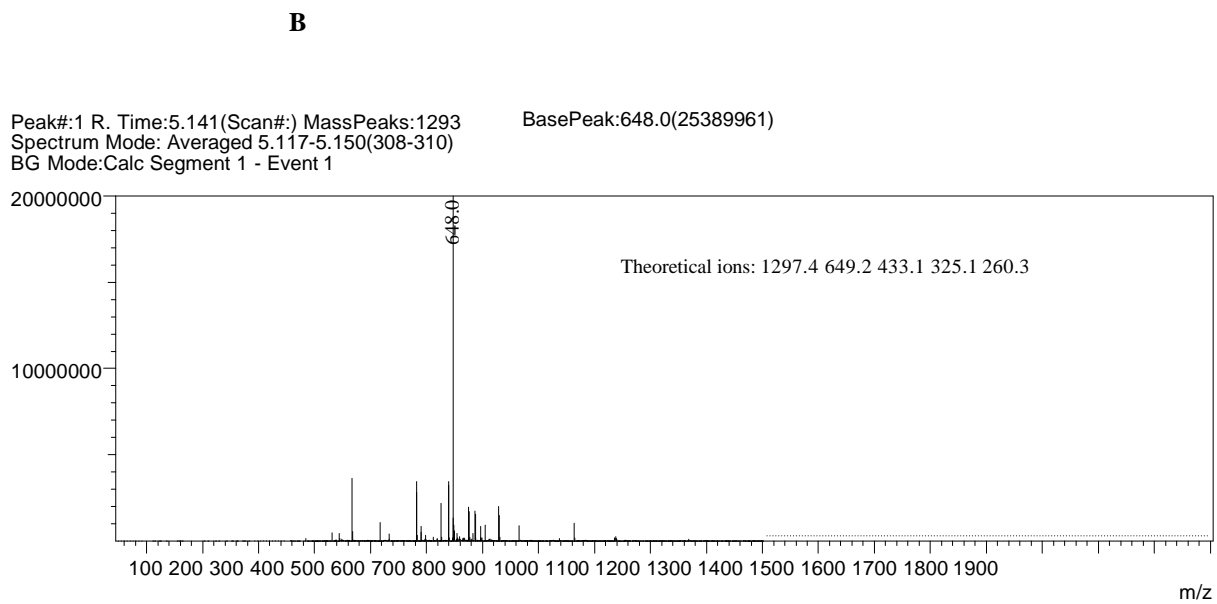

**Figure S2.** Characterization of Loop1-Ps2Aa peptide. A) Chromatogram spectra. B) mass spectra.

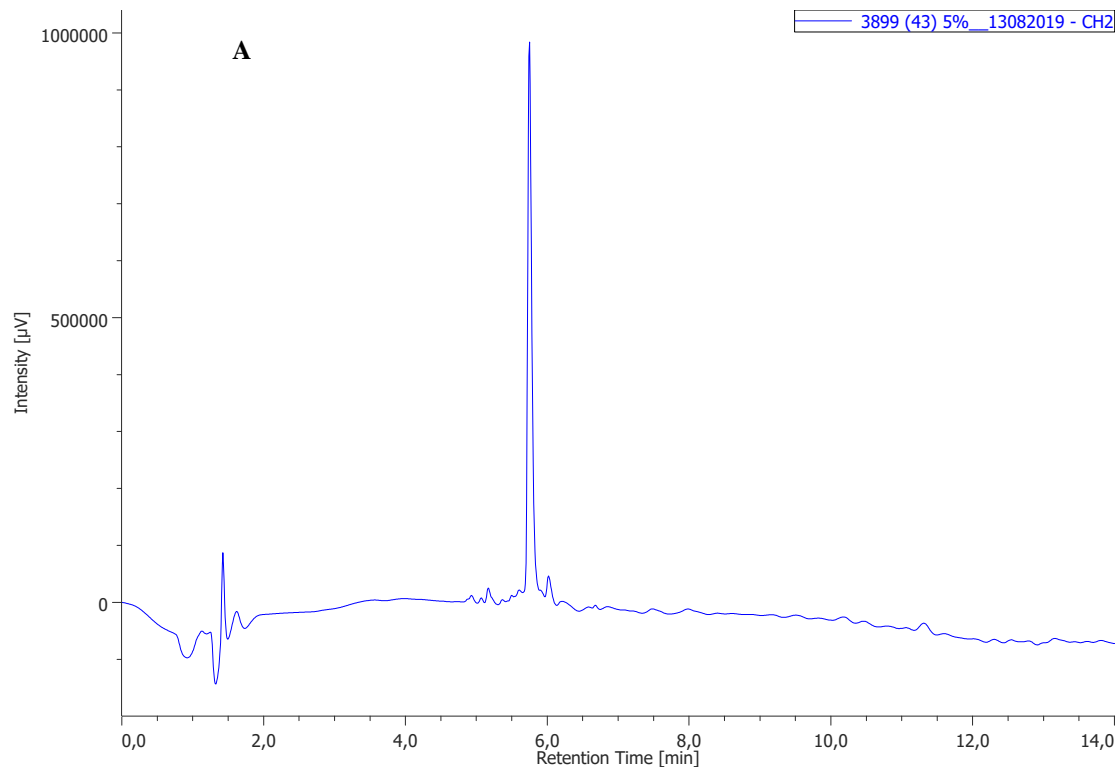

**B**

Peak#:1 R. Time:5.250(Scan#:) MassPeaks:1024 BasePeak:660.5(12535755)  
 Spectrum Mode: Averaged 5.233-5.267(315-317)  
 BG Mode:Calc Segment 1 - Event 1

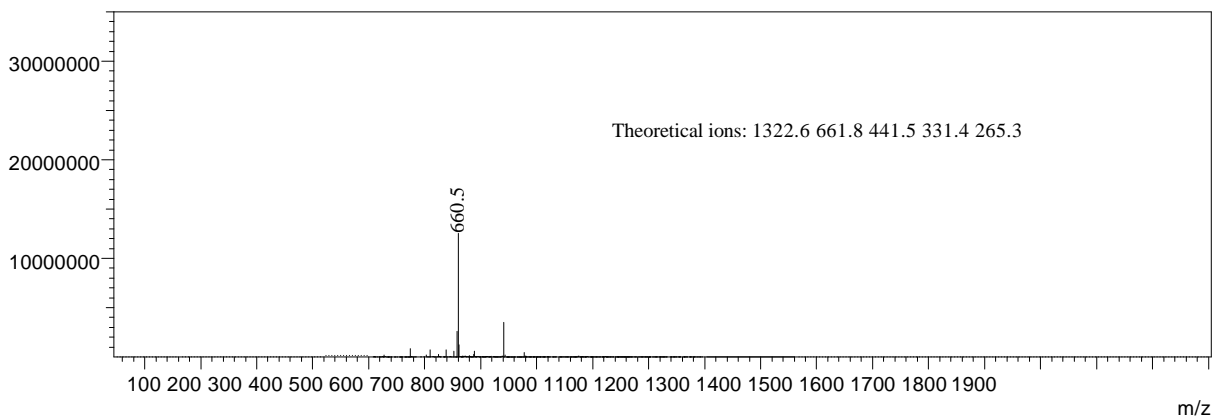

**Figure S3.** Characterization of Loop2-Ps2Aa peptide. A) Chromatogram spectra. B) mass spectra.

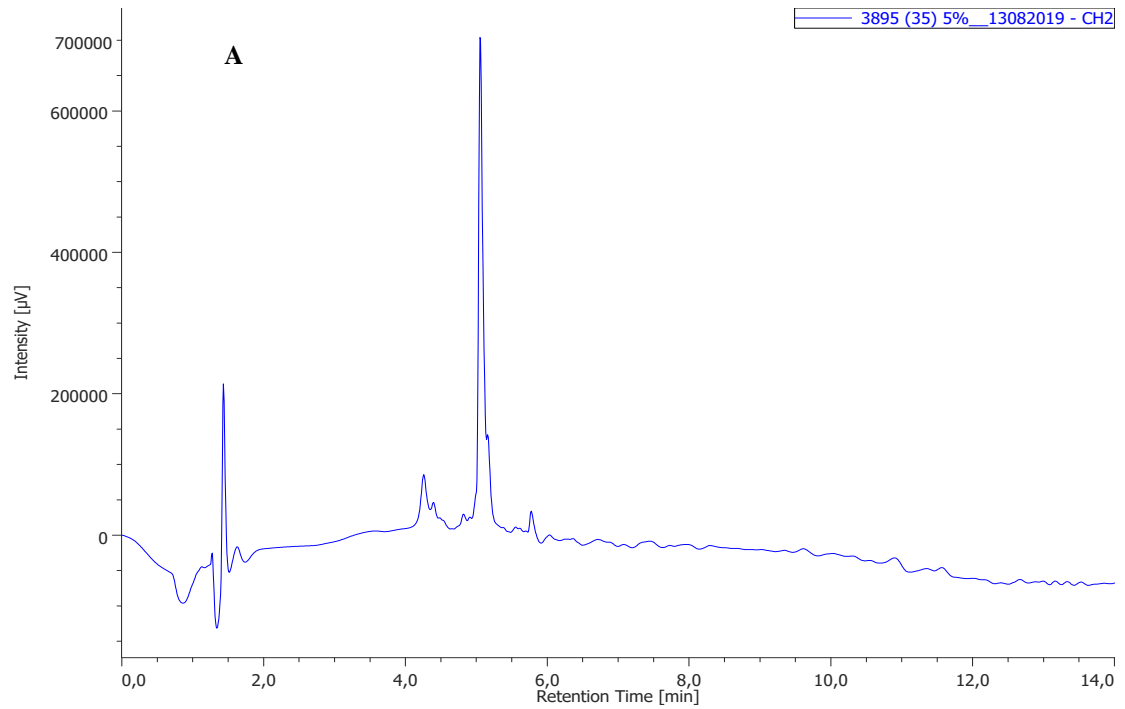

**B**

Peak#:1 R.Time:2.157(Scan#:) MassPeaks:1359 BasePeak:577.1(19323019)  
 Spectrum Mode:Averaged 2.133-2.167(129-131)  
 BG Mode:Calc Segment 1 - Event 1

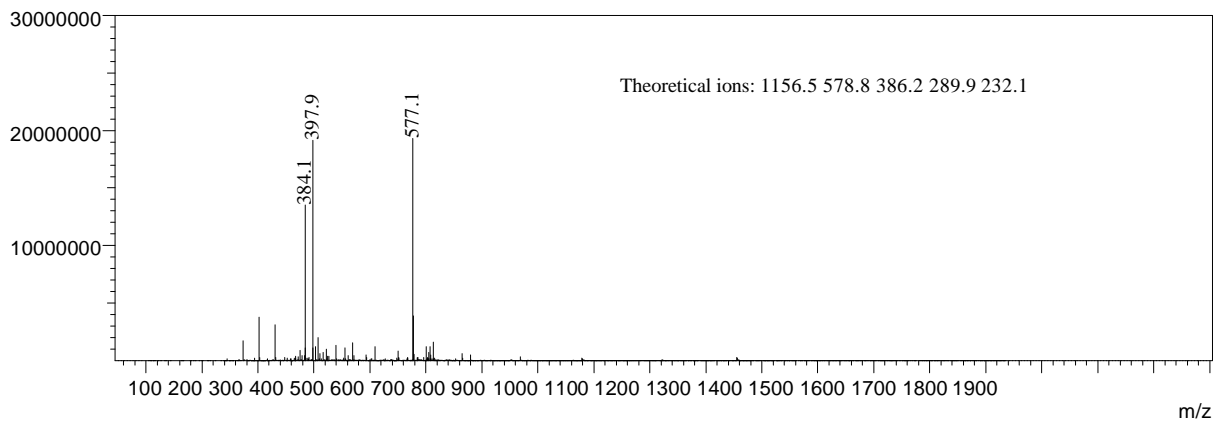

**Figure S4.** Characterization of Loop1-HCoV-229E peptide. A) Chromatogram spectra. B) mass spectra.

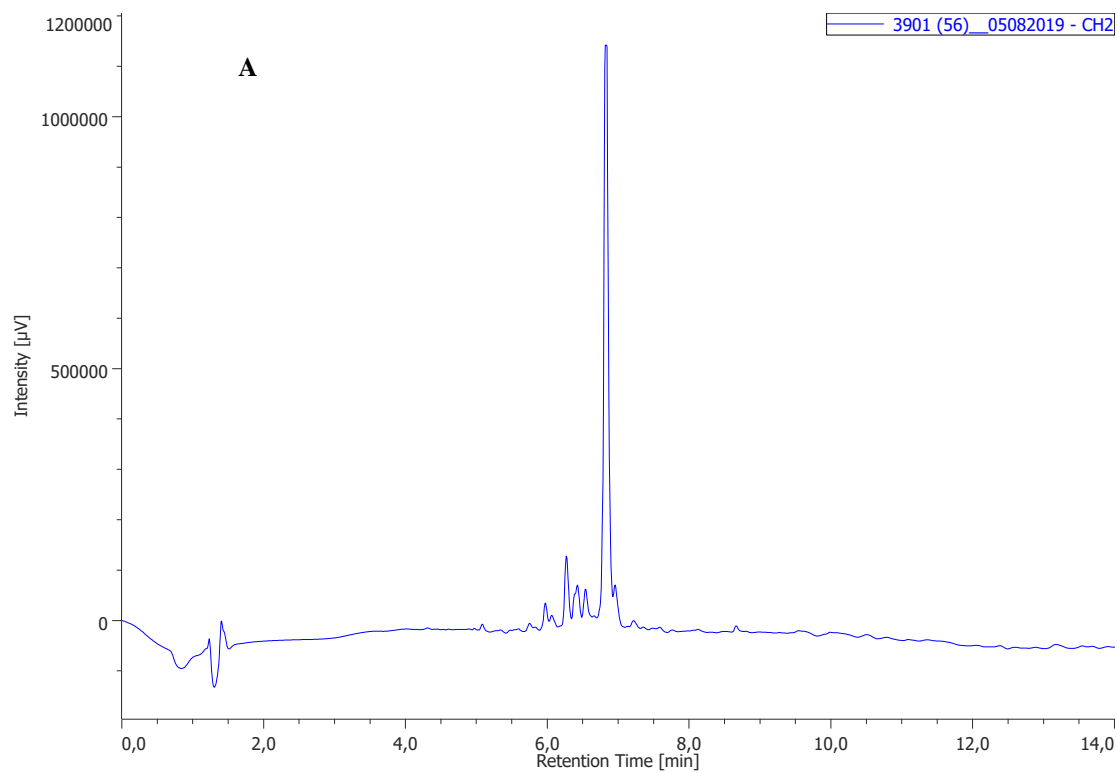

**B**

Peak#:1 R.Time:5.458(Scan#:) MassPeaks:984 BasePeak:444.8(17175589)  
 Spectrum Mode:Averaged 5.433-5.467(327-329)  
 BG Mode:Calc Segment 1 - Event 1

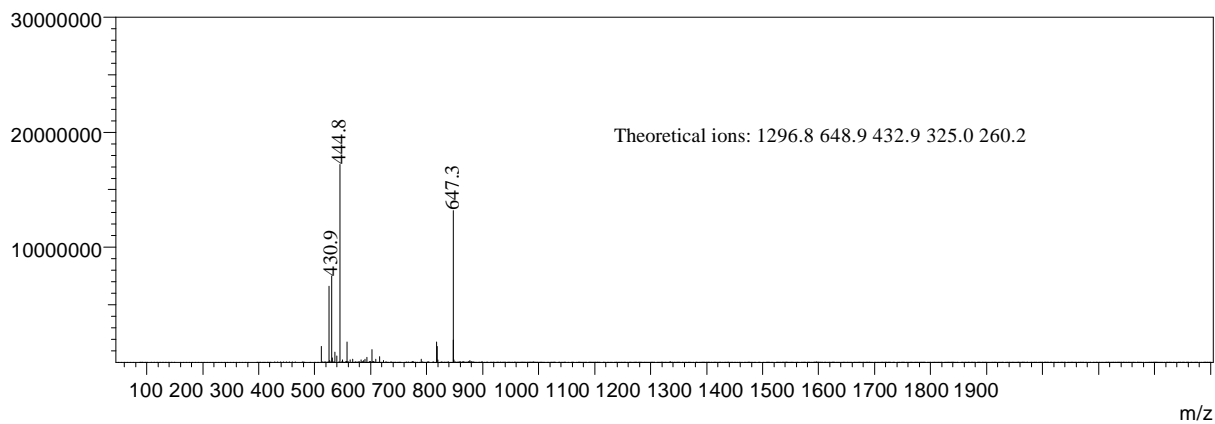

**Figure S5.** Characterization of A4W-GGN5 peptide. A) Chromatogram spectra. B) mass spectra.
